# Supplementary material for: Ancient Origin of Two 5S rDNA Families Dominating in the Genus Rosa and Their Behavior in the Canina-Type Meiosis
Source: Front Plant Sci. 2021 Mar 8;12:643548. doi: 10.3389/fpls.2021.643548 (PMC7984461; doi:10.3389/fpls.2021.643548)
Supplement: Supplementary Table 1 — Information about the taxonomy and origin of plants used in this study. [file Table_1.XLSX]

## Sheet: Tabelle1
Table S1. Information about the taxonomy and origin of plants used in this study.
Taxonomic rank*	Species/accession ID	Source/Reference	Country**	Sequence read archived/clone***
Subgenus Hesperhodos Cockerell	R. minutifolia Engelm.	published by INRA	FR, Roseraie du Val de Marne’, Haÿ-Les-Roses	SRR7077023
Subgenus Hulthemia (Dumort.) Focke	R. persica Juss. [R. berberifolia Pall.]	this study	DE, Botanic Garden Jena; XX-0-JENA-7141929	SRR7077021
Subgenus Rosa
Sect. Caninae (DC). Ser. subsect. Caninae	R. canina L. (CZ)	Lunerová et al. (2020)	CZ, Brno; coll. J. Lunerova (s.n.)	SRR8265808
	R. canina L. (DE-S27b)	Herklotz et al. (2018)	DE, Weiβenberg, coll. V. Herklotz (GLM12396)	ERR1662939
	R. canina L. (UA)	Tynkewich et al.	UA, Botanical Garden of the Chernivtsi National University
	R. corymbifera Borkh. (DE_2)	Herklotz and Ritz (2014)	DE, Weiβenberg, coll. V. Herklotz (GLM49579)	SRR8265810
	R. dumalis Bechst. (DE_34)	Herklotz et al. (2018)	DE, Weiβenberg, coll. V. Herklotz (GLM49831)	ERR1662941
Subsect. RuQgineae Christ	R. inodora Fr. (DE_12)	Herklotz and Ritz (2014)	DE, Herklotz and Ritz, 2014; Weiβenberg (GLM4959)	ERR1662940
	R. rubiginosa L.	this study	CZ, Brno; coll. J. Lunerova (s.n.)	SRR10402274
Subsect. Vestitae Christ	R. sherardii Davies	this study	SE, Balsgard, ex cult. Czech Academy of Sciences Brno, coll. H. Nybom	SRR10402273
Sect. Gallicanae DC.	R. gallica L.	Saint-Oyant et al. (2018)	FR, Rosier-sur-Loire	SRR6175524
Sect. Indicae Thory	R. chinensis Jacq.	published by INRA	FR, Roseraie du Val de Marne’, Haÿ-Les-Roses	SRR7077020
Sect. Laevigatae Thory	R. laevigata Michx.	published by INRA	FR, Roseraie du Val de Marne’, Haÿ-Les-Roses	SRR7077018
Sect. Synstylae DC.	R. arvensis Huds. (DE_8)	Lunerová et al. (2020)	DE, Botanic Garden Würzburg (GLM-172055)	SRR8265809
	R. lucieae Crép. [R. wichurana Crép.]	published by INRA	FR, no sampling details available	SRR6175519
	R. multiflora Thunb.	this study	SK, Tesarske Mlynany
		Nakamura et al. (2018)		DRR059736
Sect. Pimpinellifoliae DC.	R. spinosissima L.	Lunerová et al. (2020)	Germany, Botanical Garden Würzburg (GLM-172057)	SRR8422951
		this study (Supplement)	CZ, Rieger gardens, Prague
Sect. Rosa [Cinnamomeae DC.]	R. majalis Herrm. (DE_4)	Lunerová et al. (2020)	DE,Germany, Botanical Garden Würzburg, (GLM-172056)	SRR6175513
	R. nitida Willd.	this study	CZ, commercial source
	R. pendulina L.	Lunerová et al. (2020)	DE, Botanical Garden Tharandt	SRR6175522
	R. rugosa Thunb.	this study	CZ, Brno, coll. J. Lunerova (s.n.)
		published by INRA	no sampling details available
Outgroups				SRR6175514
Cliffortia curvifolia Weim.			no sampling details available	EU931716
Acaena latebrosa (Aiton) W.T. Aiton			no sampling details available	EU931698
Geum urbanum L.		Jordan et al. 2017	UK, Punnetts Town	ERR2187925
Footnotes:
*Taxonomy within Rosa is according to (Wissemann, 2003). Species names are according to Plants of the world online (http://www.plantsoftheworldonline.org/), synonyms used in previous phylogenies of the genus are given in brackets.
**CZ, Czech Republic; DE, Germany, FR, France, SK, Slovakia, UA, Ukraine, UK, United Kingdom, ref.: Herklotz and Ritz, (2017); Herklotz et al., (2018).
***Sequence read archives (ENA/NCQ) submitted as parts of original projects (Herklotz et al., 2018; Nakamura et al., 2018; Saint-Oyant et al., 2018; Lunerova et al., 2020)
