# Supplementary material for: Ancient Origin of Two 5S rDNA Families Dominating in the Genus Rosa and Their Behavior in the Canina-Type Meiosis
Source: Front Plant Sci. 2021 Mar 8;12:643548. doi: 10.3389/fpls.2021.643548 (PMC7984461; doi:10.3389/fpls.2021.643548)
Supplement: Supplementary Table 2 — Details of bioinformatic procedures leading to 5S rDNA genome proportion and copy number estimation. Sheet 1—5S_A variant. Sheet 2—5S_B variant. [file Table_2.XLSX]

## Sheet: Sheet 1
Table S1. Details of bioinformatic procedures leading to 5S rDNA genome proportion and copy number estimation. Sheet 1 - 5S_A variant. Sheet 2 - 5S_B variant.
AN Galaxy	species Rosa	Alignment similarity parameter (CLC)	reads	mapped reads to the 5S_A ref.	GP (%)	GS (Mbp)	GS (bp)	copies per genome
SRR8265808	canina CZ	0.9	7118538	7654	0.107522	1.52466	1.52466e+06	4087.57
		0.9	7118538	7236	0.10165	1.4414	1.4414e+06	3864.34
			file1+2		0.104586	1.48303	1.48303e+06	3975.95
ERR1662939	canina DE	0.9	12131464	7314	0.0602895	0.854905	854905	2291.97
		0.9	11838382	7695	0.0650004	0.921706	921706	2471.06
			file1+2		0.062645	0.888306	888306	2381.52
SRR8265810	corymbifera	0.9	5925220	2372	0.0400323	0.560452	560452	1502.55
		0.9	3203380	1025	0.0319975	0.447964	447964	1200.98
			file1+2		0.0360149	0.504208	504208	1351.76
ERR1662941	dumalis	0.9	11798153	8608	0.0729606	1.01707	1.01707e+06	2726.73
		0.9	12647650	8827	0.0697916	0.972895	972895	2608.3
			file1+2		0.0713761	0.994983	994983	2667.51
ERR1662940	inodora	0.9	12086429	2841	0.0235057	0.327669	327669	878.47
		0.9	12827189	2965	0.023115	0.322223	322223	863.868
			file1+2		0.0233103	0.324946	324946	871.169
SRR10402274	rubiginosa	0.9	6927194	3219	0.046469	0.653355	653355	1751.62
		0.9	6927194	3069	0.0443037	0.622909	622909	1670
			file1+2		0.0453863	0.638132	638132	1710.81
SRR10402273	sherardii	0.9	6829999	6157	0.0901464	1.26746	1.26746e+06	3398.01
		0.9	6829999	5960	0.0872621	1.22691	1.22691e+06	3289.29
					0.0887043	1.24718	1.24718e+06	3343.65
SRR6175524	gallica	0.9	34426712	4314	0.012531	0.134833	134833	361.483
		0.9	33377618	4281	0.012826	0.138007	138007	369.993
			file1+2		0.0126785	0.13642	136420	365.738
SRR8422951	spinossisima	0.9	1003689	1235	0.123046	1.11357	1.11357e+06	2985.43
		0.9	346889	72	0.0207559	0.187841	187841	503.595
			file1+2		0.071901	0.650704	650704	1744.51
SRR6175522	pendulina	0.9	65557484	41658	0.0635442	0.578888	578888	1551.98
		0.9	32790867	15828	0.0482695	0.439735	439735	1178.92
			file1+2		0.0559069	0.509312	509312	1365.45
SRR7077018	laevigata	0.9	133790000	3152	0.00235593	0.0132403	13240.3	35.4969
SRR6175519	lucieae	0.9	9553132	1210	0.012666	0.0744761	74476.1	199.668
		0.9	20326896	3394	0.0166971	0.0981789	98178.9	263.214
			file1+2		0.0146815	0.0863275	86327.5	231.441
DRR059736	multiflora	0.9	18248140	2109	0.0115573	0.0932678	93267.8	250.048
		0.9	18248140	2086	0.0114313	0.0922506	92250.6	247.321
			file 1+2		0.0114943	0.0927592	92759.2	248.684
SRR8265809	arvensis	0.9	5880446	477	0.00811163	0.0436406	43640.6	116.999
		0.9	3056478	186	0.00608544	0.0327396	32739.6	87.7738
			file1+2		0.00709853	0.0381901	38190.1	102.386
SRR7077020	chinensis	0.9	42025487	9179	0.0218415	0.122749	122749	329.087
		0.9	22549532	4239	0.0187986	0.105648	105648	283.239
			file 1+2		0.0203201	0.114199	114199	306.163
SRR6175513	majalis	0.9	45579369	35324	0.0775	0.557225	557225	1493.9
		0.9	21847108	13497	0.0617793	0.444193	444193	1190.87
			file1+2		0.0696397	0.500709	500709	1342.38
SRR6175514	rugosa	0.9	35589185	9687	0.0272189	0.133101	133101	356.838
		0.9	26667669	5621	0.021078	0.103071	103071	276.33
			file1+2		0.0241485	0.118086	118086	316.584
SRR7077023	minutifolia	0.9	129829243	99967	0.0769988	0.428883	428883	1149.82
SRR1011021	persica	0.8	151251019	41832	0.0276573	0.115055	115055	308.457
Legend:	pentaploids
	tetraploids
	diploids
PRJNA454073-1	persica		227592912	1385	0.000608543	0.00253154	2531.54	6.78696
			151215019	782	0.000517144	0.00215132	2151.32	5.76762
			227592912	1385	0.000608543	0.00253154	2531.54	6.78696

## Sheet: Sheet 2
Table S2. Details of bioinformatic procedures leading to 5S rDNA genome proportion and copy number estimation. Sheet 1 - 5S_A variant. Sheet 2 - 5S_B variant.
AN Galaxy	species Rosa	Alignment similarity parameter (CLC)	reads	mapped reads to the 5S_B ref.	GP (%)	GS (Mbp)	GS (bp)	copies per genome
SRR8265808	canina CZ	0.9	7118538	2195	0.030835	0.43724	437240	1109.75
		0.9	7118538	2091	0.029374	0.416523	416523	1057.17
			file1+2		0.0301045	0.426882	426882	1083.46
ERR1662939	canina DE	0.9	12131464	3985	0.0328485	0.465791	465791	1182.21
		0.9	11838382	3863	0.0326311	0.46271	462710	1174.39
			file1+2		0.0327398	0.46425	464250	1178.3
SRR8265810	corymbifera	0.9	5925220	1435	0.0242185	0.339059	339059	860.556
		0.9	3203380	526	0.0164202	0.232838	232838	590.959
			file1+2		0.0203193	0.288128	288128	731.29
ERR1662941	dumalis	0.9	11798153	2703	0.0229104	0.31937	319370	810.585
		0.9	12647650	3067	0.0242496	0.338039	338039	857.967
			file1+2		0.02358	0.328705	328705	834.276
ERR1662940	inodora	0.9	12086429	1482	0.0122617	0.170928	170928	433.827
		0.9	12827189	1551	0.0120915	0.168556	168556	427.806
			file1+2		0.0121766	0.169742	169742	430.817
SRR10402274	rubiginosa	0.9	6927194	1101	0.0158939	0.223468	223468	567.178
		0.9	6927194	1064	0.0153598	0.215958	215958	548.117
					0.0156268	0.219713	219713	557.647
SRR10402273	sherardii	0.9	6829999	1086	0.0159004	0.22356	223560	567.412
		0.9	6829999	1012	0.014817	0.208327	208327	528.748
					0.0153587	0.215944	215944	548.08
SRR6175524	gallica	0.9	34426712	2965	0.0086125	0.0926705	92670.5	235.204
		0.9	33377618	2956	0.00885623	0.0952931	95293.1	241.861
			file1+2		0.00873437	0.0939818	93981.8	238.532
SRR8422951	spinosissima	0.8	1003689	106	0.010561	0.0955774	95577.4	242.582
SRR6175522	pendulina	0.9	65557484	32	4.88121e-05	0.000444678	444.678	1.12863
		0.9	32790867	43	0.000131134	0.00119463	1194.63	3.03206
			file1+2		8.99731e-05	0.000819655	819.655	2.08034
SRR7077018	laevigata	0.9	133790000	45629	0.0341049	0.19167	191670	486.471
SRR6175519	lucieae	0.9	9553132	312	0.00326594	0.0192038	19203.8	48.7405
		0.9	20326896	1688	0.00830427	0.0488291	48829.1	123.932
			file1+2		0.0112348	0.0660609	66060.9	167.667
DRR059736	multiflora	0.9	18248140	6273	0.0343761	0.277415	277415	704.099
		0.9	18248140	5877	0.032206	0.259903	259903	659.651
			file 1+2		0.0332911	0.268659	268659	681.875
SRS4095336	arvensis	0.9	7098669	1232	0.0173554	0.0933719	93371.9	236.984
		0.9	7098669	1186	0.0167074	0.0898856	89885.6	228.136
			file1+2		0.0170314	0.0916287	91628.7	232.56
SRR7077020	chinensis	0.9	42025487	7139	0.0169873	0.0954687	95468.7	242.306
		0.9	22549532	3004	0.0133218	0.0748684	74868.4	190.021
			file 1+2		0.0133218	0.0773996	77399.6	196.446
SRR6175513	majalis	0.9	45579369	103	0.000225979	0.00162479	1624.79	4.12384
		0.9	21847108	36	0.000164782	0.00118478	1184.78	3.00705
			file1+2		0.00019538	0.00140479	1404.79	3.56545
SRR6175514	rugosa	0.9	35589185	26	7.30559e-05	0.000424455	424.455	1.0773
		0.9	26667669	26	9.74963e-05	0.000566454	566.454	1.4377
			file1+2		8.52761e-05	0.000495454	495.454	1.2575
SRR7077023	minutifolia	0.9	129829243	55	4.23633e-05	0.000235964	235.964	0.598893
SRR1011021	persica	0.8	151251019	25325	0.0167437	0.0696537	69653.7	176.786
Legend:	pentaploids
	tetraploids
	diploids
