# Supplementary material for: Ancient Origin of Two 5S rDNA Families Dominating in the Genus Rosa and Their Behavior in the Canina-Type Meiosis
Source: Front Plant Sci. 2021 Mar 8;12:643548. doi: 10.3389/fpls.2021.643548 (PMC7984461; doi:10.3389/fpls.2021.643548)
Supplement: Supplementary Table 3 — Summary of genome proportions and copy number of 5S rDNA families in Rosa genomes. [file Table_3.XLSX]

## Sheet: list SNV, genome proportion (2)
Table S3. Summary of genome proportions and copy number of 5S rDNA families in Rosa genomes
species	genome size 2C (Mbp)	genome proportion (%)		copy number/2C		SNV per 1000 bp
		A variant	B variant	A variant	B variant	A variant	B variant
R. laevigata	1124	0.002	0.034	80	980	150	117
R. corymbifera*	2812	0.036	0.02	2700	1460	147	28
R. canina (CZ)	2836	0.105	0.03	7960	2180	139	89
R. canina (DE)	2836	0.063	0.033	4760	2360	54	71
R. dumalis*	2812	0.071	0.024	5340	1680	43	58
R. gallica	2152	0.013	0.009	740	480	48	137
R. arvensis	1076	0.007	0.017	200	380	67	76
R. rubiginosa	2812	0.045	0.015	3420	1120	174	43
R. inodora	2788	0.023	0.012	1740	860	105	102
R. sherardii*	2812	0.089	0.016	6680	1100	136	36
R. multiflora	1614	0.011	0.033	500	1360	86	76
R. lucieae	1176	0.015	0.011	460	320	83	81
R. chinensis	1124	0.02	0.015	620	440	72	79
R. persica	832	0.028	0.017	620	360	153	142
R. spinosissima	1810	0.072	0.011	3500	480	147	107
R. rugosa	978	0.024	0	640	0	62	0
R. majalis	1438	0.07	0	2680	0	40	0
R. pendulina	1822	0.056	0	1740	0	180	0
R. minutifolia	1114	0.077	0	2300	0	102	0
Average	1893.05	0.0435263	0.0156316	2456.84	818.947	104.632	82.8
Legend: *-taken according to R. rubiginosa
