# Supplementary material for: Ancient Origin of Two 5S rDNA Families Dominating in the Genus Rosa and Their Behavior in the Canina-Type Meiosis
Source: Front Plant Sci. 2021 Mar 8;12:643548. doi: 10.3389/fpls.2021.643548 (PMC7984461; doi:10.3389/fpls.2021.643548)
Supplement: Supplementary Table 4 — Summary of cytogenetic FISH analyses. [file Table_4.XLSX]

## Sheet: List1
Ref. 4A					Identity
	Total reads	Mapped reads	GP		0.8	Mapped reads	GP
R. caninaCZ	7118538	7654	0.107522			8901	0.12504
Ref. 24B
R. caninaCZ	7118538	2195	0.030835			2432	0.0341643
Ref 5S genic
	Total reads	Mapped reads	GP
R. caninaCZ	7118538	3695	0.0519067

## Sheet: FISH results
Table S4. Summary of cytogenetic analyses
species/country		chromosomes source	chromosome number	Chromosomes		Bivalents						Univalents					Mitotic chromosomes
						Number of signals			Colocalisation			Number of signals			Colocalisation		Number of signals			Colocalisation
				bivalent	univalent	5S_A	5S_B	18S	*C-A18	*C-B18		5S_A	5S_B	18S	*C-B18	*Triple	5S_A	5S_B	18S	*C-A18	*C-B18	*Triple
R. corymbifera	DE	meiosis	2n=5x=35	14	21	2	2	2		yes (2)		2	2	4	yes (2)
R. canina	CZ	meiosis	2n=5x=35	14	21	2	2	2		yes (2)		3	2	2		yes (1)
R. inodora	DE	meiosis	2n=5x=35	14	21	2	0	2				3	2	2	yes (2)
R. rubiginosa	CZ	meiosis	2n=5x=35	14	21	2	0	2				2	2	2	yes (1)
R. persica	DE	meiosis	2n=2x=14	14		2	2	4	yes (2)	yes (2)
R. arvensis	DE	meiosis	2n=2x=14	14		2	2	2		yes (2)
R. multiflora	SK	meiosis	2n=2x=14	14		2	2	2		yes (2)
R. rugosa	CZ	meiosis	2n=2x=14	14		2	0	2
R. majalis	DE	meiosis	2n=2x=14	14		2	0	2
R. spinosissima	CZ	mitosis (roots)	2n=4x=28														3	4	4		yes (2)	yes (2)
R. nitida	CZ	mitosis (roots)	2n=2x=14														2	0	4	yes (2)
Footnote
*C-A18- colocalisation of 5S_A variant with 18S rDNA, C-B18- colocalisation of 5S_B variant with 18S rDNA, Triple-colosalization of 5S-5S_A-5S_B
